# Supplementary material
Source: Springer Nature journal article supplement (https://www.springermedizin.de/resource/supplementary/12967_2012_1445_MOESM6_ESM.pdf/9574746)
Supplement: MOESM6 [file 9574746]

**A**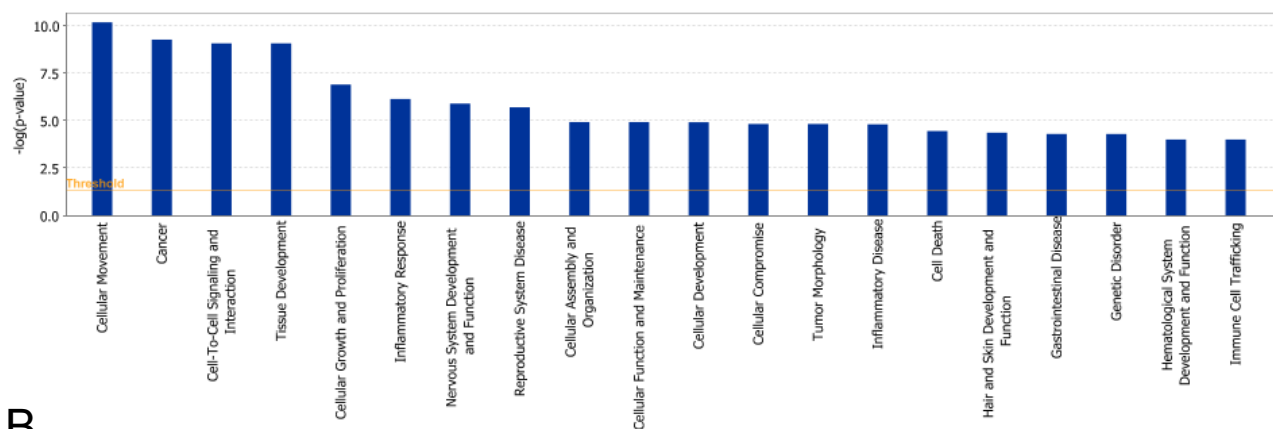**B**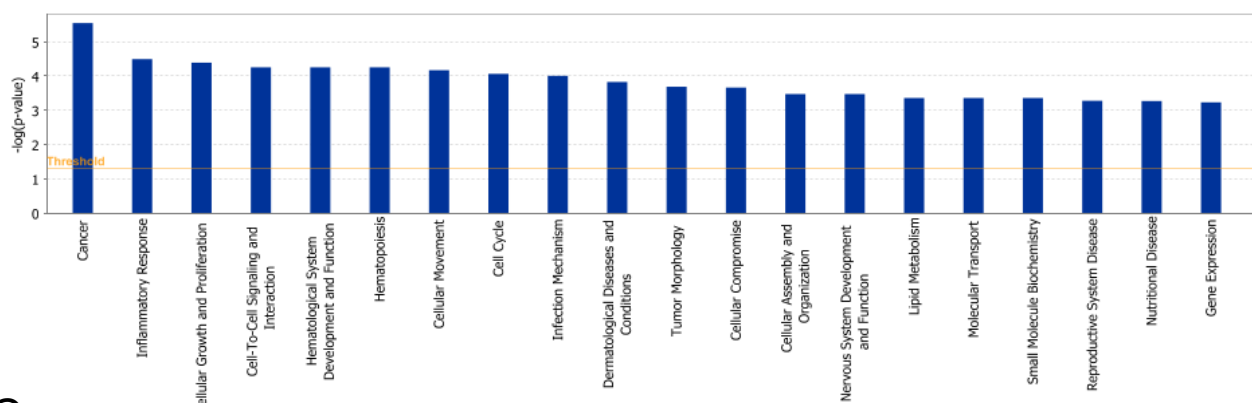**C**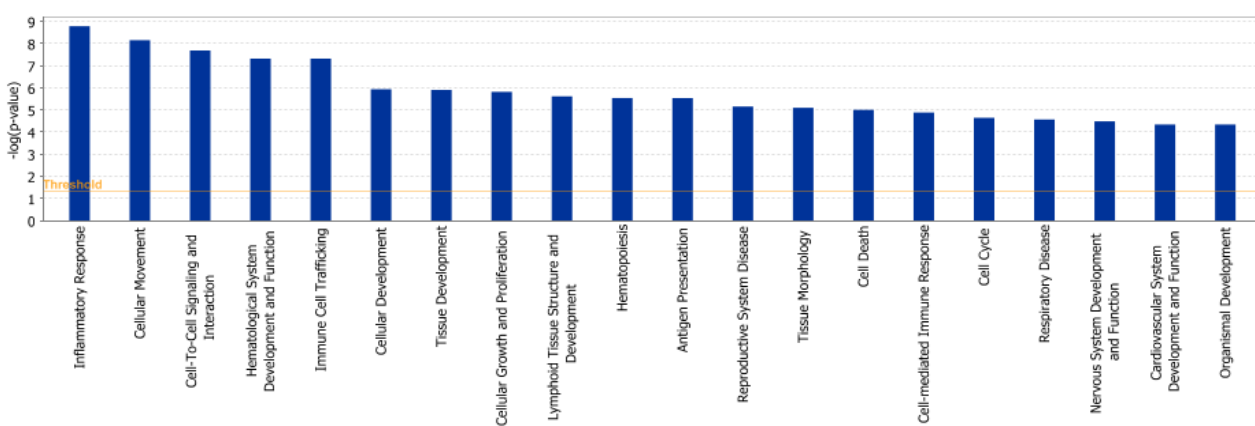

**Supplementary Figure 1.** Ingenuity Pathways Analysis of the differentially expressed genes in the miR-200c (A), miR-205 (B), and miR-375 (C) mimics transfected MDA-MB-231 cells revealed the enrichment of different functional groups respectively.

A

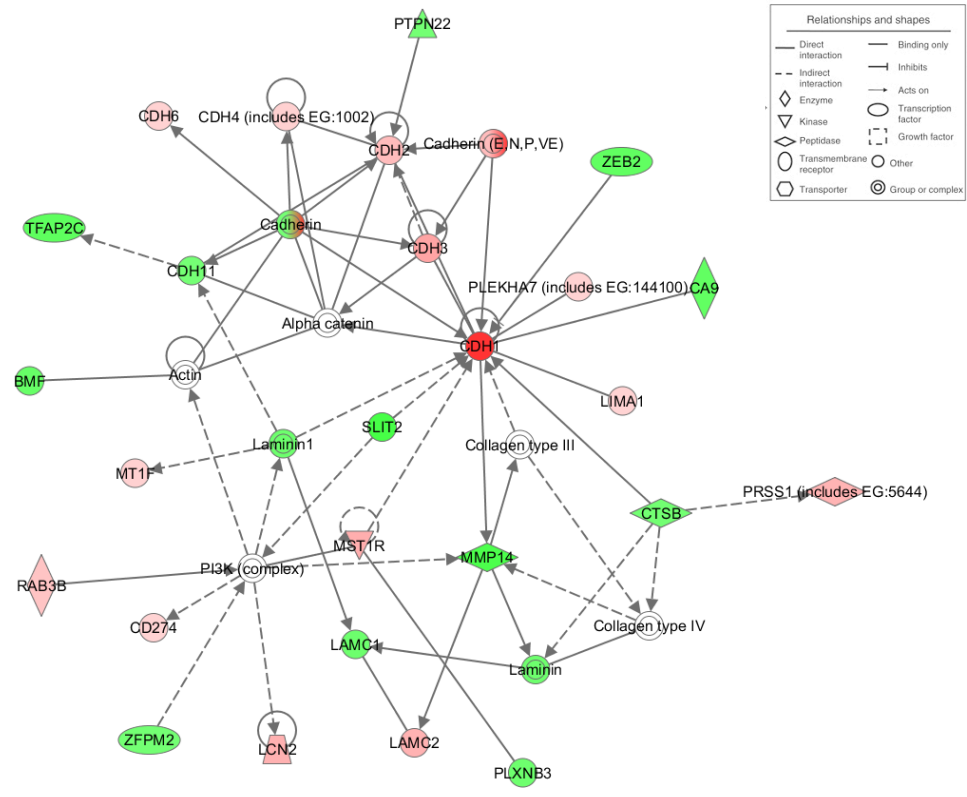

B

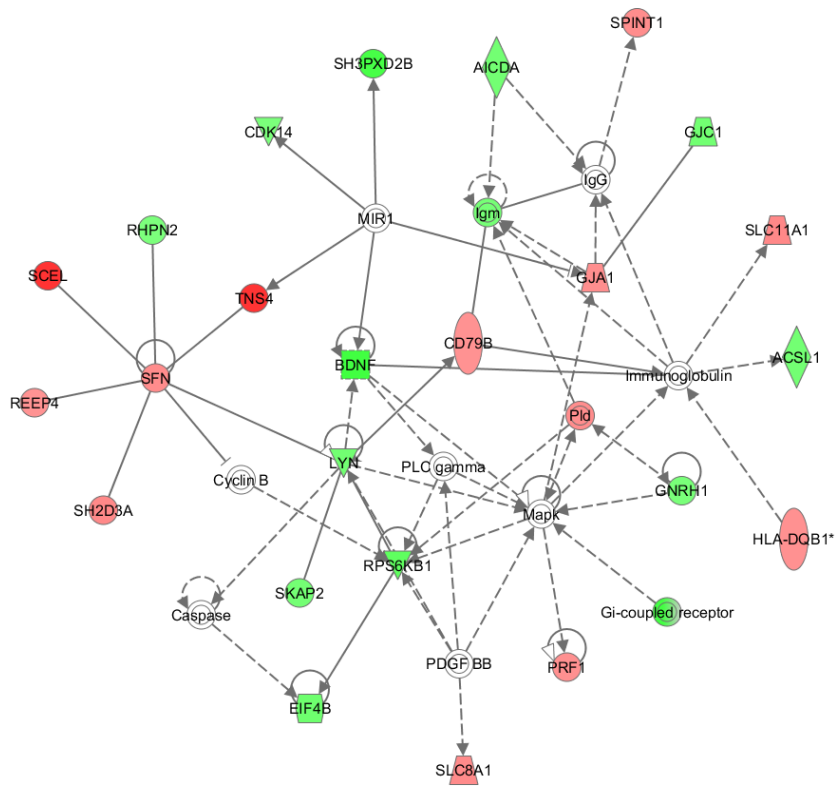

C

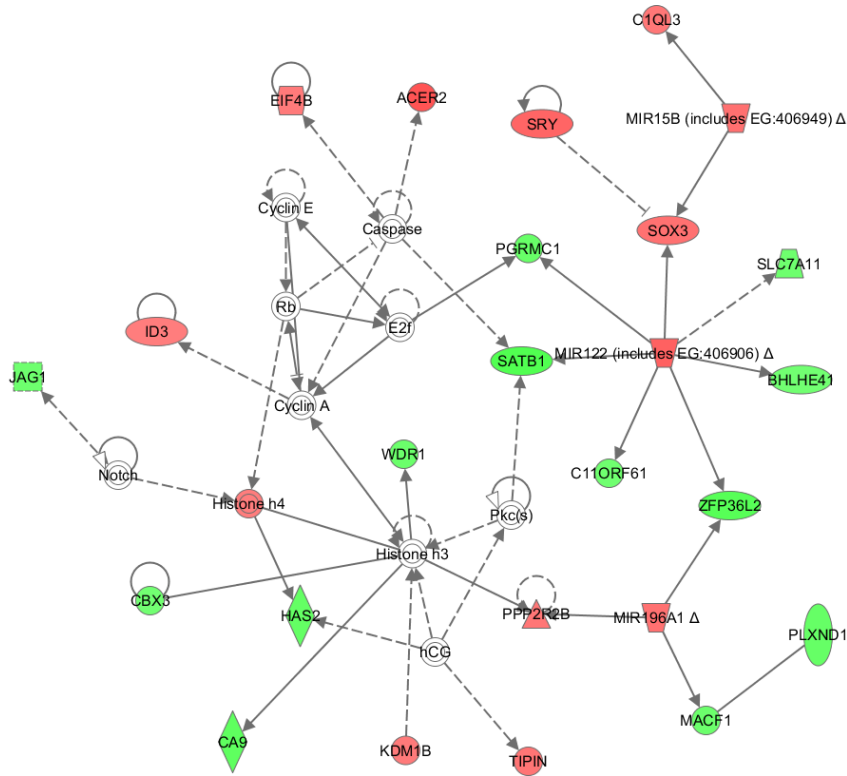

**Supplementary Figure 2.** Ingenuity Knowledge Base Analysis of the differentially expressed genes in the miR-200c (A), miR-205 (B), and miR-375 (C) mimics transfected MDA-MB-231 cells identified interesting molecular interaction networks.

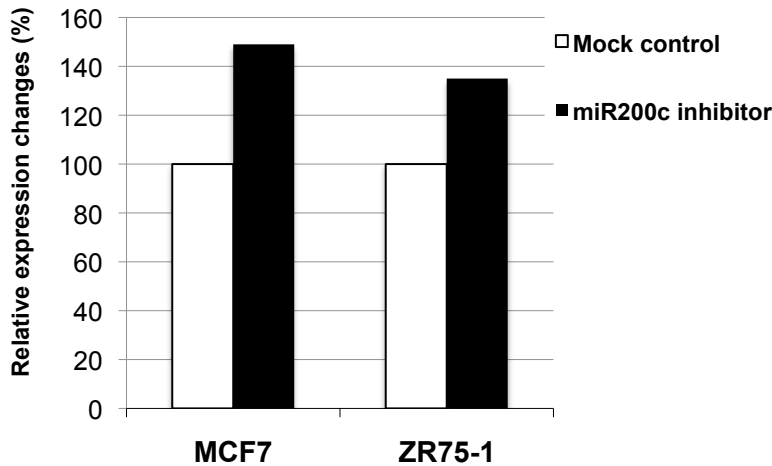

**Supplementary Figure 3.** qRT-PCR analysis of CFL2 expression in miR-200c inhibitor transfected MCF7 and ZR-75-1 cell lines that express endogenous miR-200c. miR-200c inhibitor (Ambion, Austin TX) was transfected at a concentration of 50nM with Lipofectmine 2000 (Invitrogen). Total RNA was harvested at 48 hr after transfection and converted to cDNA for qRT-PCR analysis.
